# Supplementary material for: The coexistence of MET over-expression and an EGFR T790M mutation is related to acquired resistance to EGFR tyrosine kinase inhibitors in advanced non-small cell lung cancer
Source: PubMed Central journal article supplement (PMC5239477; doi:10.18632/oncotarget.9697), 2016-05-30
Supplement: oncotarget-07-51311-s001.pdf [file oncotarget-07-51311-s001.pdf]

# The coexistence of MET over-expression and an EGFR T790M mutation is related to acquired resistance to EGFR tyrosine kinase inhibitors in advanced non-small cell lung cancer

## SUPPLEMENTARY FIGURES AND TABLES

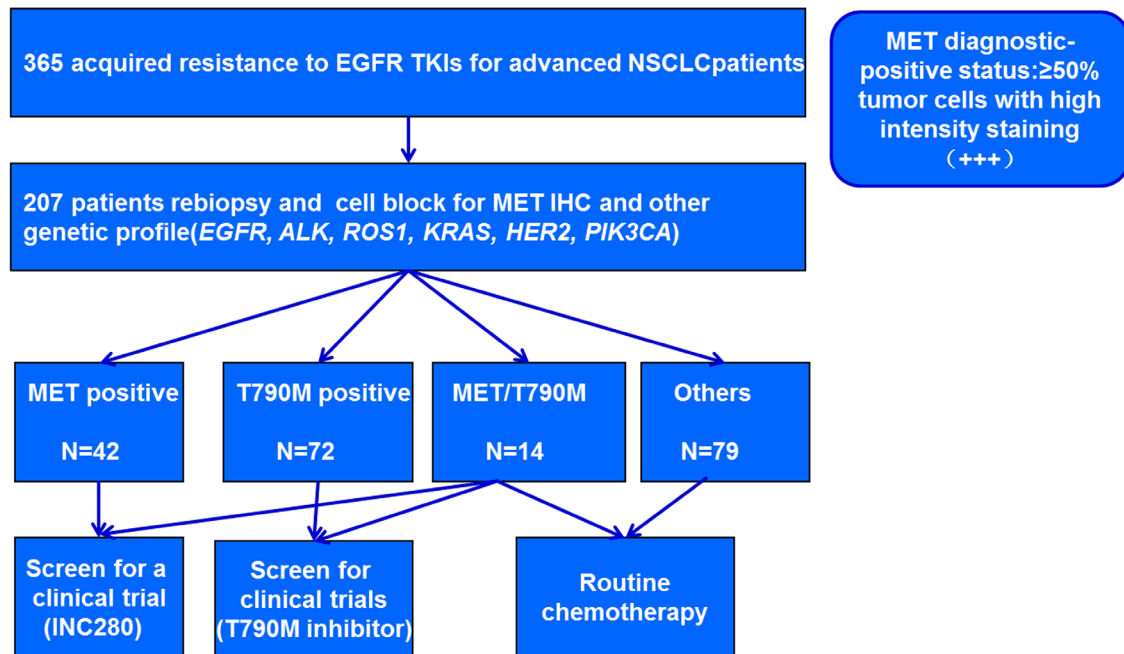

Supplementary Figure S1: Flow chart

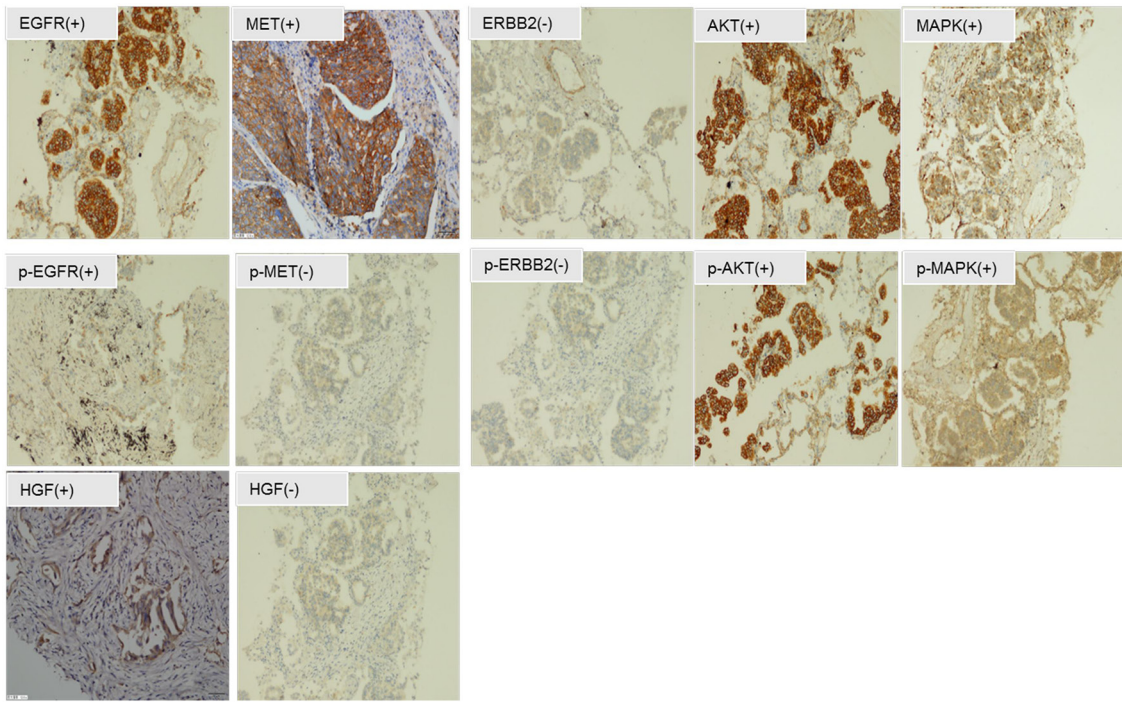

**Supplementary Figure S2: Protein expression of c-Met, p-Met, EGFR, p-EGFR, HGF, ERBB3, p-ERBB3, AKT, p-AKT, MAPK, and p-MAPK in tumors**

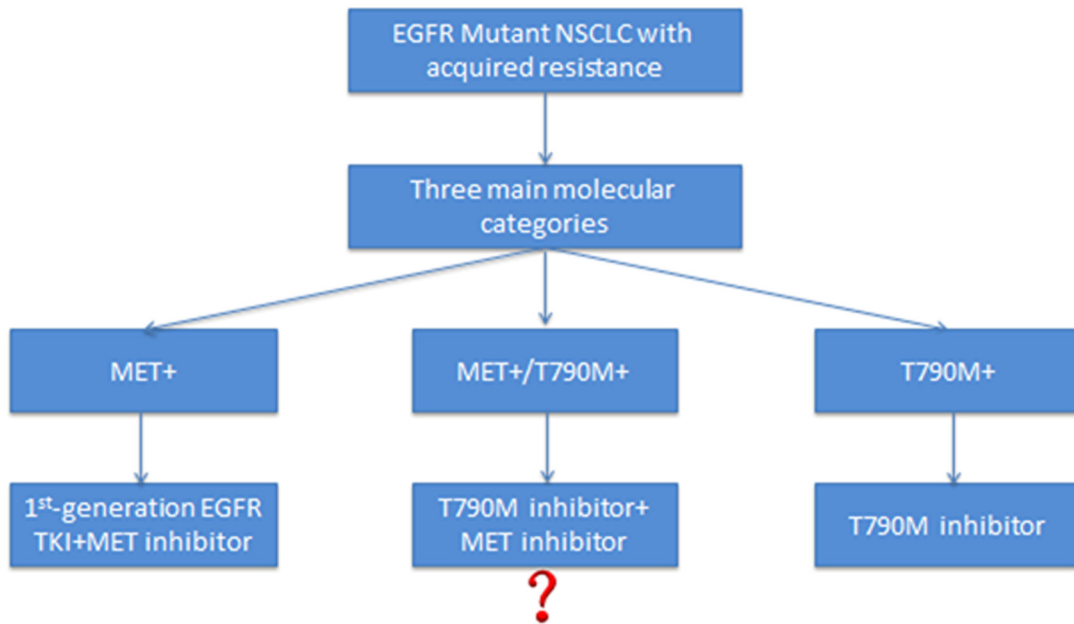

Supplementary Figure S3: Schema of overcoming AR to EGFR-TKIs in advanced NSCLC by targeting underlying molecular mechanisms

Supplementary Table S1: Baseline clinical and molecular characteristics (N=207)

| Variable category   | n (%)       |
|---------------------|-------------|
| Age (median, range) | 56(21-81)   |
| <65                 | 159(76.8%)  |
| ≥65                 | 48(23.2%)   |
| Gender              | 91(44.0%)   |
| Male                | 116 (56.0%) |
| Female              |             |
| Smoking status      | 161 (77.8%) |
| Smoker              | 46 (22.2%)  |
| Nonsmoker           |             |
| ECOG PS             | 201(97.1%)  |
| ≤1                  | 6(2.9%)     |
| ≥2                  |             |
| Histology           | 200 (96.6%) |
| ADC                 | 3 (1.4%)    |
| SCC                 | 3(1.4%)     |
| ADC with SCC        | 1(1.5%)     |
| ADC with LCC        |             |
| Clinical stage      | 60 (29.0%)  |
| M1a IV              | 147 (71.0%) |
| M1b IV              |             |
| EGFR mutation       | 130 (62.8%) |
| DEL                 | 70(33.8%)   |
| L858R               | 7 (3.4%)    |
| Others              |             |
| EGFR TKIs           | 102(49.3%)  |
| Gefitinib           | 103(49.8%)  |
| Erlotinib           | 1(1.0%)     |
| Others              |             |
| MET                 | 56(27.1%)   |
| Positive            | 161(72.9%)  |
| Negative            |             |
| T790M               | 86(41.5%)   |
| Positive            | 121(58.5%)  |
| Negative            |             |

ECOG PS, Eastern Cooperative Oncology Group performance status;  
EGFR, epidermal growth factor receptor.

**Supplementary Table S2: Efficacy of the combination of EGFR-TKI and MET inhibitor or T790M inhibitor only for the patients with MET/T790M coexistence.**

See Supplementary File 1
